# Supplementary material
Source: publisher figshare collection journal article supplement (https://karger.figshare.com/articles/dataset/_/5121604)
Supplement: Supplementary file 1 [file 1]

**For the online version**

Video Clip 1: Real time B mode scanning showed increased swirling within the cord mass.

Video Clip 2: Real time power Doppler imaging showed a jet spurting into the cord mass.
